# Supplementary material for: Complexes of guest–host type between C60 and group 9 metalloporphyrins
Source: Royal Society of Chemistry journal article supplement (doi:10.1039/c7nj05081j), 2018-01-01
Supplement: c7nj05081j1.pdf [file c7nj05081j1.pdf]

## Supporting Information

### Complexes of guest-host type between C<sub>60</sub> and group 9 metallocporphyrins

*Ching Tat To and Kin Shing Chan\**

Department of Chemistry, The Chinese University of Hong Kong, Shatin, New Territories, Hong  
Kong SAR, People's Republic of China

E-mail: [ksc@cuhk.edu.hk](mailto:ksc@cuhk.edu.hk)

#### Contents

|                                |       |
|--------------------------------|-------|
| 1. Experimental                | p. S2 |
| 2. NMR Spectra                 | p. S5 |
| 3. X-Ray Crystallographic Data | P. S7 |
| 4. References                  | p. S8 |

## 1. Experimental

### General Procedures and Instrumentation

Unless otherwise noted, all reagents were purchased from commercial suppliers and directly used without further purification. Hexane was distilled from anhydrous calcium chloride.  $\text{Ir}^{\text{III}}(\text{ttp})\text{Ph}^1$  and  $\text{Co}^{\text{III}}(\text{ttp})\text{Ph}^2$  were prepared according to the literature procedures.

$^1\text{H}$  and  $^{13}\text{C}\{^1\text{H}\}$  spectra were recorded on a Bruker AV-400 instrument at 400 and 100 MHz, respectively. Chemical shifts were referenced with the residual solvent protons in  $\text{C}_6\text{D}_6$  ( $\delta$  7.15 ppm) in  $^1\text{H}$  NMR spectra as the internal standards and in  $\text{CDCl}_3$  ( $\delta$  77.16 ppm) in  $^{13}\text{C}\{^1\text{H}\}$  NMR spectra as the internal standards. Chemical shifts ( $\delta$ ) are reported in hertz (Hz). Coupling constants ( $J$ ) were reported in Hertz (Hz).

All single crystals were immersed in Paraton-N oil and sealed under  $\text{N}_2$  in thin-walled glass capillaries. Data were collected at 296 K on a Bruker SMART 1000 CCD diffractometer using  $\text{MoK}_\alpha$  radiation. An empirical absorption correction was applied using the SADABS program. All structures were solved by direct methods and subsequent Fourier difference techniques and refined anisotropically for all non-hydrogen atoms by full-matrix least squares calculations on  $F^2$  using the SHELXTL program package. All hydrogen atoms were geometrically fixed using the riding model.

**Preparation of 1:1 stoichiometric ratio of  $\text{C}_{60}$  and  $\text{Ir}^{\text{III}}(\text{ttp})\text{Ph}$ .**  $\text{Ir}^{\text{III}}(\text{ttp})\text{Ph}$  (2.5 mg, 0.00266 mmol) was dissolved in toluene (1.5 mL) to give a red solution.  $\text{C}_{60}$  (2.0 mg, 0.00278 mmol) was added into the solution. The solution mixture was treated in an ultrasonic cleaner (47kHz) for 1 min to give a dark brown solution. The single crystal obtained, namely  $\text{C}_{60}\cdot 3\text{Ir}^{\text{III}}(\text{ttp})\text{Ph}$ , for X-

ray diffraction analysis was grown from slow diffusion of hexane vapour into the above toluene solution in the dark using vial in a vial method. Samples for  $^1\text{H}$  and  $^{13}\text{C}\{^1\text{H}\}$  NMR analysis were prepared separately in benzene- $d_6$  and  $\text{CDCl}_3$ , respectively.  $^1\text{H}$  NMR (400 MHz,  $\text{C}_6\text{D}_6$ ):  $\delta$  1.08 (d, 2 H,  $J = 8.0$  Hz), 2.40 (s, 12 H), 4.92 (t, 2 H,  $J = 7.6$  Hz), 5.24 (t, 1 H,  $J = 7.2$  Hz), 7.20 (d, 4 H,  $J = 8.0$  Hz), 7.27 (d, 4 H,  $J = 7.6$  Hz), 7.88 (dd, 4 H,  $J = 7.6$  Hz, 1.6 Hz), 7.97 (d, 4 H,  $J = 7.2$  Hz), 8.77 (s, 8 H).  $^{13}\text{C}\{^1\text{H}\}$  NMR (100 MHz,  $\text{CDCl}_3$ ):  $\delta$  21.7, 120.2, 123.2, 123.9, 127.5, 127.6, 128.8, 131.7, 133.6, 134.1, 137.3, 137.6 (coordinated  $\text{C}_{60}$ ), 138.8, 142.8.

**Preparation of 2:1 stoichiometric ratio of  $\text{C}_{60}$  and  $\text{Ir}^{\text{III}}(\text{ttp})\text{Ph}$ .**  $\text{Ir}(\text{ttp})\text{Ph}$  (2.5 mg, 0.00266 mmol) was dissolved in toluene (1.5 mL) to give a red solution.  $\text{C}_{60}$  (4.0 mg, 0.00532 mmol) was added into the solution. The solution mixture was treated in an ultrasonic cleaner (47kHz) for 1 min to give a dark brown solution. The single crystal obtained, namely  $\text{C}_{60}\cdot\text{Ir}^{\text{III}}(\text{ttp})\text{Ph}$ , for X-ray diffraction analysis was grown from slow diffusion of hexane vapour into the above toluene solution in the dark using vial in a vial method. Due to the poor quality of single crystal, the X-ray analysis data obtained from below was presented.

**Preparation of 3:1 stoichiometric ratio of  $\text{C}_{60}$  and  $\text{Ir}^{\text{III}}(\text{ttp})\text{Ph}$ .**  $\text{Ir}(\text{ttp})\text{Ph}$  (2.5 mg, 0.00266 mmol) was dissolved in toluene (1.5 mL) to give a red solution.  $\text{C}_{60}$  (6.0 mg, 0.00833 mmol) was added into the solution. The solution mixture was treated in an ultrasonic cleaner (47kHz) for 1 min to give a dark brown solution. The single crystal obtained, namely  $\text{C}_{60}\cdot\text{Ir}^{\text{III}}(\text{ttp})\text{Ph}$ , for X-ray diffraction analysis was grown from slow diffusion of hexane vapour into the above toluene solution in the dark using vial in a vial method. Samples for  $^1\text{H}$  and  $^{13}\text{C}\{^1\text{H}\}$  NMR analysis were prepared separately in benzene- $d_6$  and  $\text{CDCl}_3$ , respectively.  $^1\text{H}$  NMR (400 MHz,  $\text{C}_6\text{D}_6$ ):  $\delta$  1.10 (d, 2 H,  $J = 8.4$  Hz), 2.39 (s, 12 H), 4.93 (t, 2 H,  $J = 7.4$  Hz), 5.24 (t, 1 H,  $J = 7.2$  Hz), 7.20 (d, 4 H,  $J = 7.6$  Hz), 7.27 (d, 4 H,  $J = 7.2$  Hz), 7.88 (d, 4 H,  $J = 7.6$  Hz), 7.99 (d, 4 H,  $J = 6.8$  Hz), 8.78 (s, 8

H).  $^{13}\text{C}\{^1\text{H}\}$  NMR (100 MHz,  $\text{CDCl}_3$ ):  $\delta$  21.7, 120.5, 123.2, 123.8, 127.5, 127.7, 128.1, 132.0, 133.5, 133.9, 137.3, 138.9, 139.6 (coordinated  $\text{C}_{60}$ ), 142.4.

**Preparation of 1:1 stoichiometric ratio of  $\text{C}_{60}$  and  $\text{Co}^{\text{III}}(\text{ttp})\text{Ph}$ .**  $\text{Co}^{\text{III}}(\text{ttp})\text{Ph}$  (2.2 mg, 0.00273 mmol) was dissolved in toluene (1.5 mL) to give a red solution.  $\text{C}_{60}$  (2.0 mg, 0.00278 mmol) was added into the solution. The solution mixture was treated in an ultrasonic cleaner (47kHz) for 1 min to give a dark brown solution. The single crystal obtained, namely  $\text{toluene}\cdot\text{C}_{60}\cdot\text{Co}^{\text{III}}(\text{ttp})\text{Ph}$ , for X-ray diffraction analysis was grown from slow diffusion of hexane vapour into the above toluene solution in the dark using vial in a vial method.

## 2. NMR Spectra

### $^1\text{H}$ NMR Spectrum of $\text{C}_{60}:\text{Ir}^{\text{III}}(\text{ttp})\text{Ph} = 1:1$ ( $\text{C}_6\text{D}_6$ , 400 MHz)

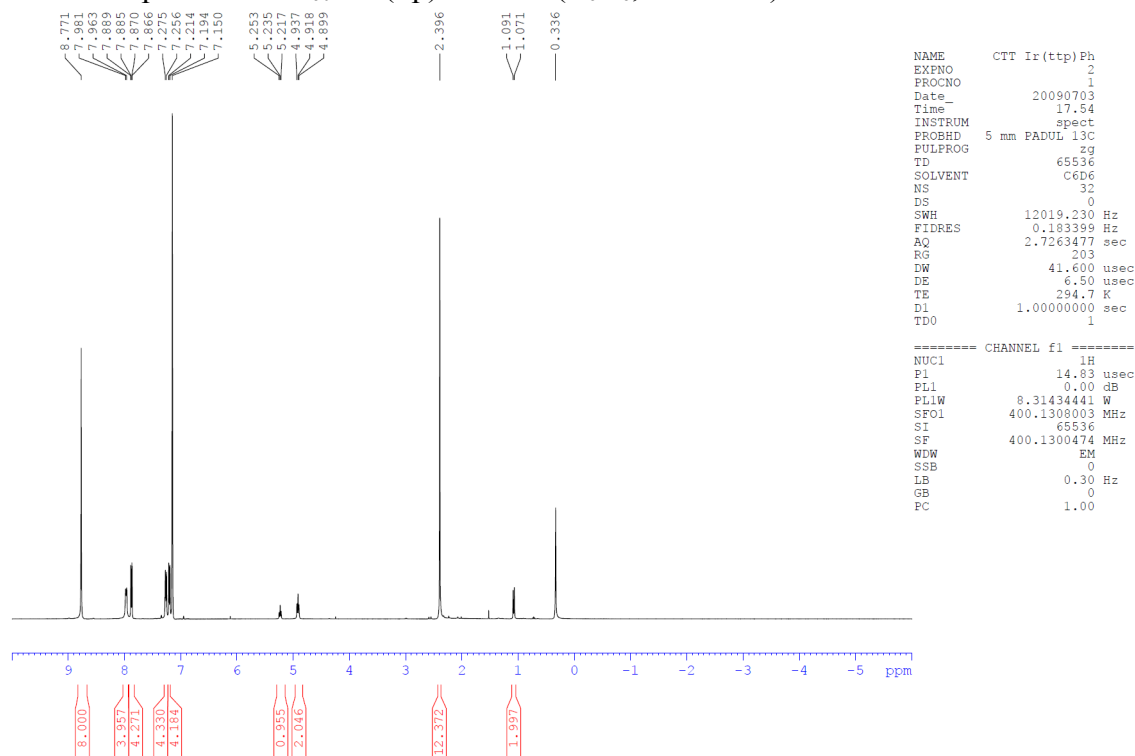

### $^1\text{H}$ NMR Spectrum of $\text{C}_{60}:\text{Ir}^{\text{III}}(\text{ttp})\text{Ph} = 3:1$ ( $\text{C}_6\text{D}_6$ , 400 MHz)

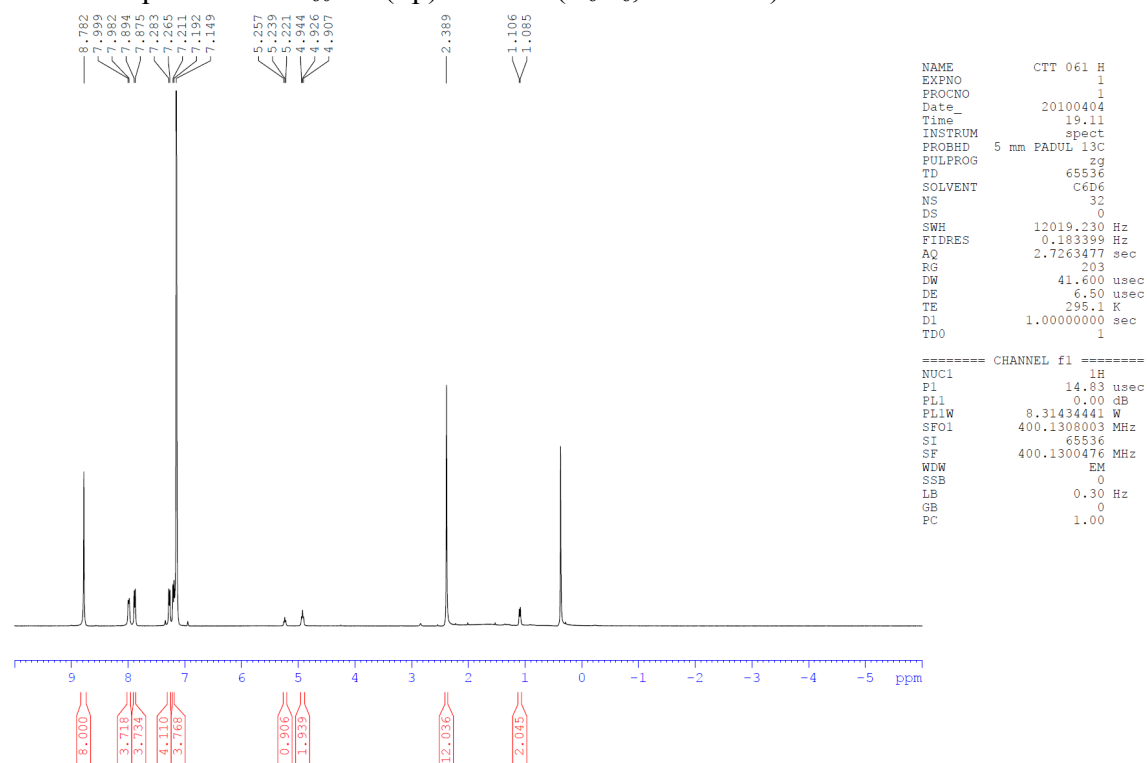

$^{13}\text{C}\{^1\text{H}\}$  NMR Spectrum of  $\text{C}_{60}:\text{Ir}^{\text{III}}(\text{ttp})\text{Ph} = 1:1$  ( $\text{CDCl}_3$ , 100 MHz)

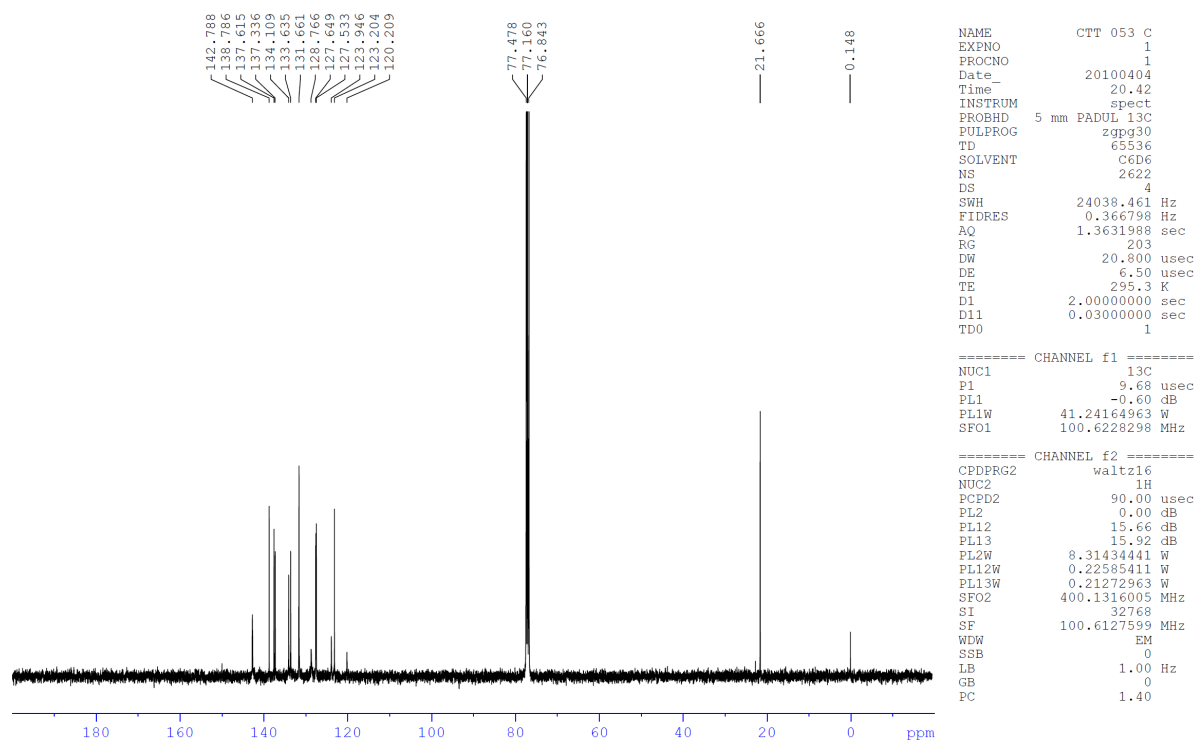

$^{13}\text{C}\{^1\text{H}\}$  NMR Spectrum of  $\text{C}_{60}:\text{Ir}^{\text{III}}(\text{ttp})\text{Ph} = 3:1$  ( $\text{CDCl}_3$ , 100 MHz)

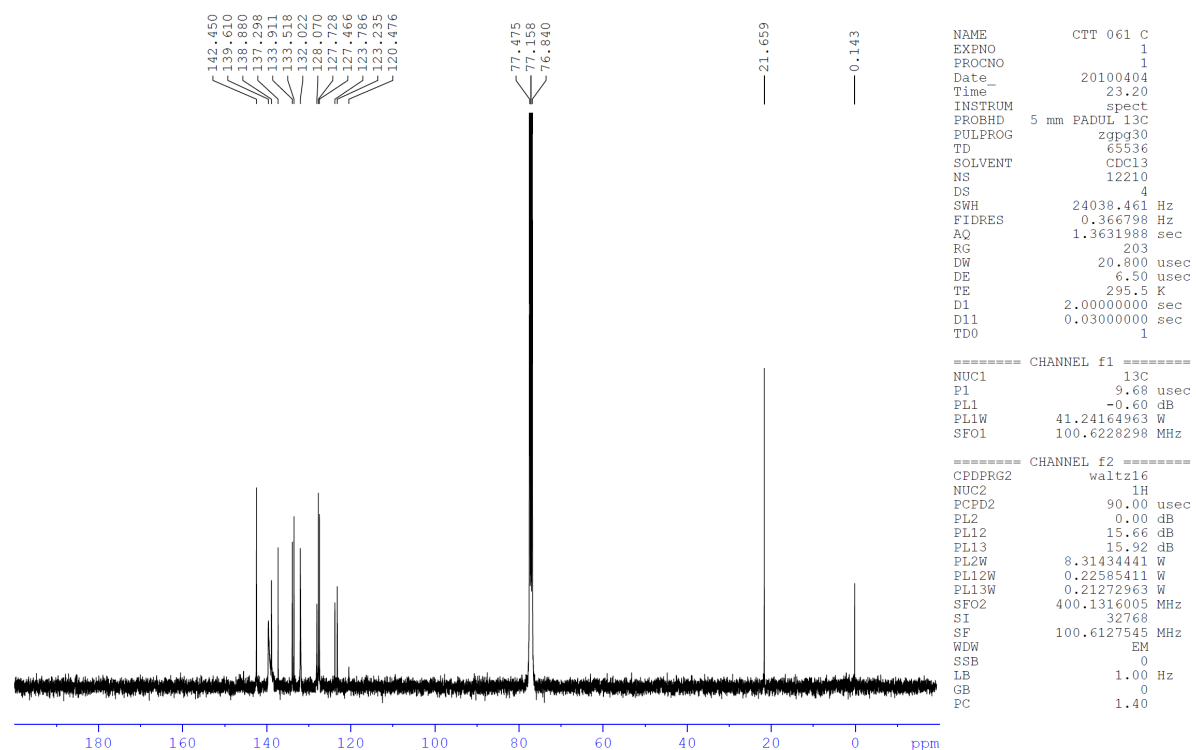

### 3. X-Ray Crystallographic Data

**Table S1.** Crystal data and summary of data collection and refinement

|                                                      | C <sub>60</sub> ·Ir <sup>III</sup> (ttp)Ph                        | C <sub>60</sub> ·3Ir <sup>III</sup> (ttp)Ph                       | C <sub>60</sub> ·Co <sup>III</sup> (ttp)Ph/C <sub>7</sub> H <sub>8</sub> |
|------------------------------------------------------|-------------------------------------------------------------------|-------------------------------------------------------------------|--------------------------------------------------------------------------|
| CCDC number                                          | 1573104                                                           | 1573102                                                           | 1573103                                                                  |
| color, shape                                         | red, block                                                        | red, block                                                        | red, block                                                               |
| empirical formula                                    | C <sub>114</sub> H <sub>41</sub> N <sub>4</sub> Ir                | C <sub>222</sub> H <sub>123</sub> N <sub>12</sub> Ir <sub>3</sub> | C <sub>121</sub> H <sub>49</sub> N <sub>4</sub> Co                       |
| formula wt                                           | 1658.71                                                           | 3534.92                                                           | 1617.64                                                                  |
| temp (K)                                             | 296(2)                                                            | 296(2)                                                            | 296(2)                                                                   |
| wavelength (Å)                                       | 0.71073                                                           | 0.71073                                                           | 0.71073                                                                  |
| cryst syst                                           | monoclinic                                                        | triclinic                                                         | monoclinic                                                               |
| space group                                          | C2/c                                                              | P-1                                                               | C2/c                                                                     |
| unit cell dimens                                     |                                                                   |                                                                   |                                                                          |
| <i>a</i> (Å)                                         | 16.3792(7)                                                        | 18.078(3)                                                         | 16.367(3)                                                                |
| <i>b</i> (Å)                                         | 22.5894(10)                                                       | 19.791(4)                                                         | 22.892(4)                                                                |
| <i>c</i> (Å)                                         | 21.6432(10)                                                       | 27.758(5)                                                         | 21.508(4)                                                                |
| $\alpha$ (deg)                                       | 90                                                                | 89.910(4)                                                         | 90                                                                       |
| $\beta$ (deg)                                        | 94.0580(10)                                                       | 89.021(3)                                                         | 93.794(4)                                                                |
| $\gamma$ (deg)                                       | 90                                                                | 64.574(3)                                                         | 90                                                                       |
| volume (Å <sup>3</sup> )                             | 7987.8(6)                                                         | 8968(3)                                                           | 8041(3)                                                                  |
| <i>Z</i>                                             | 4                                                                 | 2                                                                 | 4                                                                        |
| calcd density (g cm <sup>-3</sup> )                  | 1.379                                                             | 1.309                                                             | 1.297                                                                    |
| abs coeff (mm <sup>-1</sup> )                        | 1.728                                                             | 2.278                                                             | 0.272                                                                    |
| <i>F</i> (000)                                       | 3320                                                              | 3540                                                              | 3224                                                                     |
| cryst size (mm)                                      | 0.400 x 0.300 x 0.200                                             | 0.400 x 0.300 x 0.200                                             | 0.400 x 0.300 x 0.200                                                    |
| $\theta$ range for data collection (deg)             | 1.538 to 25.247                                                   | 0.734 to 25.000                                                   | 1.758 to 25.250                                                          |
| limiting indices                                     | -19<= <i>h</i> <=19<br>-27<= <i>k</i> <=27<br>-25<= <i>l</i> <=25 | -20<= <i>h</i> <=18<br>-23<= <i>k</i> <=23<br>-33<= <i>l</i> <=33 | -19<= <i>h</i> <=19<br>-27<= <i>k</i> <=27<br>-25<= <i>l</i> <=25        |
| no. of rflns collected                               | 50527                                                             | 103733                                                            | 44095                                                                    |
| independent rflns                                    | 7240 [R(int) = 0.0464]                                            | 30498 [R(int) = 0.0653]                                           | 7279 [R(int) = 0.0869]                                                   |
| completeness to $\theta$ = 25.242                    | 99.8%                                                             | 94%                                                               | 99.8%                                                                    |
| absorp corr                                          | semi-empirical from equivalents                                   | multi-scan                                                        | multi-scan                                                               |
| max. and min. transmn                                | 0.7456 and 0.6166                                                 | 0.7456 and 0.6360                                                 | 0.7456 and 0.6579                                                        |
| refinement method                                    | full-matrix least-squares on F <sup>2</sup>                       |                                                                   |                                                                          |
| no. of data/ restraints / params                     | 7240/15/538                                                       | 30498/20/2134                                                     | 7079/47/601                                                              |
| GOF                                                  | 1.115                                                             | 1.123                                                             | 1.235                                                                    |
| final R indices [ <i>I</i> >2 $\sigma$ ( <i>I</i> )] | R <sub>1</sub> = 0.0335<br>wR <sub>2</sub> = 0.0859               | R <sub>1</sub> = 0.1019<br>wR <sub>2</sub> = 0.3007               | R <sub>1</sub> = 0.1127<br>wR <sub>2</sub> = 0.3073                      |
| R indices (all data)                                 | R <sub>1</sub> = 0.0377<br>wR <sub>2</sub> = 0.0874               | R <sub>1</sub> = 0.1318<br>wR <sub>2</sub> = 0.3200               | R <sub>1</sub> = 0.1419<br>wR <sub>2</sub> = 0.3307                      |
| largest diff. peak and hole (e Å <sup>-3</sup> )     | 1.398 and -1.902                                                  | 7.967 and -4.310                                                  | 3.156 and -0.464                                                         |

#### 4. References

1. C. W. Cheung and K. S. Chan, *Organometallics*, 2011, **30**, 4269-4283.
2. C. R. Liu, Y. Y. Qian and K. S. Chan, *Dalton Trans.*, 2014, **43**, 7771-7779.
